# Supplementary material
Source: publisher site journal article supplement (https://www.dovepress.com/article/supplementary_file/562457/562457%20Supplementary.docx)
Supplement: Supplementary file 1 [file 562457%20Supplementary.docx]

# Supplementary

Table S1. Spearman correlation matrix (rho and p-value) between MARS-5 and BMQ subscale scores (N = 213).

|  | **MARS-5** | **BMQ – SN** | **BMQ – SC** | **BMQ –GO** | **BMQ - GH** |
| --- | --- | --- | --- | --- | --- |
| **MARS-5** | 1 |  |  |  |  |
| **BMQ – SN** | 0.1556 0.0222 | 1 |  |  |  |
| **BMQ – SC** | -0.1753 0.0104 | 0.3821 <0.0001 | 1 |  |  |
| **BMQ –GO** | -0.1885 0.0058 | 0.0417 0.5452 | 0.3545 | 1 |  |
| **BMQ - GH** | -0.3690 <0.0001 | 0.1278 0.0626 | 0.4655 <0.0001 | 0.6797 <0.0001 | 1 |

Abbreviations: MARS-5 = Medication Adherence Rating Scale, BMQ = Beliefs about Medicines Questionnaire, SN = Specific Necessity, SC = Specific Concerns, GO = General Overuse, GH = General Harm.

Table S2 Antidepressants taken by participants and their active ingredients

| **Medication Name** | **Active Ingredient** |
| --- | --- |
| Xanax / Helex / Frontin | Alprazolam |
| Rivotril | Clonazepam |
| Cipralex / Scippa | Escitalopram |
| Rexetin / Paretin / Parogen | Paroxetine |
| Zoloft/ Sertralin | Sertraline |
| Mirzaten / Mirtadepi/ Yarocen | Mirtazapine |
| Velaxin/Falven | Venlafaxine |
| Dulsevia / Duciltia / Dulodet | Duloxetine |
| Anafranil | Clomipramine |
| Melipramin | Imipramine |
| Trittico | Trazodone |
| Aurorix | Moclobemide |
| Brintellix | Vortioxetine |
| Valdoxan / Agomelatin | Agomelatine |
| Lamolep / Lamictal | Lamotrigine |
| Ketilept / Quetiapine / Kventiax | Quetiapine |
| Depakine | Valproic acid |
| Trileptal | Oxcarbazepine |
| Olvexya | venlafaxine |
| Risperdal / Ripedon | Risperidone |
| Citalopram / Citapram / Citagen | Citalopram |
